# Supplementary material
Source: PubMed Central journal article supplement (PMC2648097)
Supplement: tpc.108.063693_1.pdf [file tpc.108.063693_1.pdf]

### Map based cloning of *Lj Nap1*

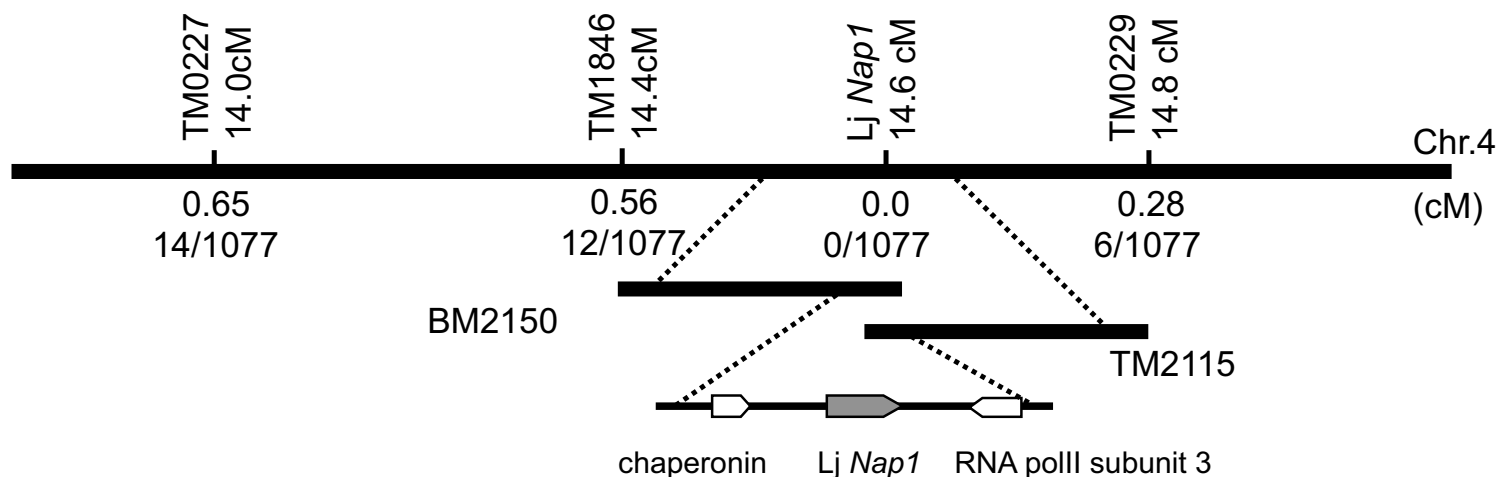

Supplemental Figure 1. The genomic region surrounding *Lj Nap1* on linkage group 4 is shown with cM position. The cM distance from *Lj Nap1* to adjacent microsatellite markers, the fraction of recombinant plants and the BAC (BM)/TAC (TM) contig are indicated. The two genes flanking *Lj Nap1* are shown. The orientation of the BM2150+TM2115 contig is not known.

```

LjNAP 1:MAKSRQQLINODSSLSPTAARSRLDGPFRWADYLGDDV...SSPVSSSTSSRNLFHDGQSQGNTPTSSQSGKGLNMQWVQLTFAVAGLMAK: 88
MtNAP 1:MAKSRQSSNODSSLSPTAARSREWDGFSRWADYLGDTNTASPLSSSTSSRNFCFDGQSQGTPS...QPHKGLNMQWVQLTFAVAGLMAK: 89
AtNAP 1:MANSRQYYPSSODSSMSPTSRSREWDGFSRWTEYLGPEM...AASVSSTSSRNLSKQITDGHVGCST...KALNMQWVQLTFAVAGLMAK: 81

. . . 100 . . . 110 . . . 120 . . . 130 . . . 140 . . . 150 . . . 160 . . . 170 . . . 180
LjNAP 89:MYRLNQQLLYPDPVNHVFSDFGFWKAGVFPNHPRVCVLLSKKFFPEHFSKLOERIDKIAWDSMODHAELHLQSLPEWVQLLLDLMAFREQA: 178
MtNAP 90:MYRLNQQLLYPDPVNHVFSDFGFWKAGVFPNHPRVCVLLSKKFFPEHFSKLOERIDKIAWDSMODHAELHLQSLPEWVQLLLDLMAFREQA: 179
AtNAP 82:MYRLNQQLLYPDPVGHVFSDFGFWKAGVFPNHPRVCVLLSKKFFPEHFSKLOERIDKFSLDSLHDCAELHLQSLPEWVQLLLDLMAFREQA: 171

. . . 190 . . . 200 . . . 210 . . . 220 . . . 230 . . . 240 . . . 250 . . . 260 . . . 270
LjNAP 179:LRLLDSSVTITLLPHONSLILHAFMDLFCFVVRVNLFAEKMPRKMLLOVYNLLHVMSRNERDCDFYHRLVQFIDSYDPPKLGLOEDLN: 268
MtNAP 180:LRLLDSSVTITLLPHONSLILHAFMDLFCFVVRVNLFA...MPRKMLLOVYNLLHVMSRNERDCDFYHRLVQFIDSYDPPKLGLOEDLN: 266
AtNAP 172:LRLLDSSVTITLLPHONSLILHAFMDLFCFVVRVNLFAEKMPRKMLLOVYNLLHVMSRNERDCDFYHRLVQFIDSYDPPKLGLOEDLN: 261

. . . 280 . . . 290 . . . 300 . . . 310 . . . 320 . . . 330 . . . 340 . . . 350 . . . 360
LjNAP 269:FVSPRIGEVLEAVGPIIFLSADTKLRNEGFLSPYHPRFPDILTNSAHPRAQDLANVTA YREWVLLGYLVCPELRRVTSIDIALVVLK: 358
MtNAP 267:FVSPRIGEVLEAVGPIIFLSADTKLRNEGFLSPYHPRFPDILTNSAHPRAQDLANVTA YREWVLLGYLVCPELRRVTSIDIALVVLK: 356
AtNAP 262:FVSPRIGEVLEAVGPIIFLSADTKLRNEGFLSPYHPRFPDILTNSAHPRAQDLANVTS YREWVLLGYLVCPELRRVTSIDIALVVLK: 351

. . . 370 . . . 380 . . . 390 . . . 400 . . . 410 . . . 420 . . . 430 . . . 440 . . . 450
LjNAP 359:ENLVVTLFRDEYILLHEDYQLYVLPRLLESKKMAKSGRTKQEKADMEYNVAKQVEKMISEVHEQALLSCDAIHRERRILLKQEI GRMVLV: 448
MtNAP 357:ENLVVTLFRDEYILLHEDYQLYVLPRLLESKKMAKSGRTKQEKADMEYNVAKQVEKMISEVHEQALLSCDAIHRERRILLKQEI GRMVLV: 446
AtNAP 352:ENLVVTLFRDEYILLHEDYQLYVLPRLLESKKMAKSGRTKQEKADMEYNVAKQVEKMISEVHEQALLSCDAIHRERRILLKQEI GRMVLV: 441

. . . 460 . . . 470 . . . 480 . . . 490 . . . 500 . . . 510 . . . 520 . . . 530 . . . 540
LjNAP 449:FTDQPSLLAPNIQMVFSALALAOCEVWYFQHVGVASSKSKTRVVPVDIDPNDPTIGFLLDGMDELCCLVKRYIAAARGYLSLSYSSCA: 538
MtNAP 447:FTDQPSLLAPNIQMVFSALALAOCEVWYFQHVGVASSKSKTRVVPVDIDPNDPTIGFLLDGMDELCCLVKRYIAAARGYLSLSYSSCA: 536
AtNAP 442:FTDQPSLLAPNIQMVFSALALAOCEVWYFQHVGVASSKSKARVVPVDIDPNDPTIGFLLDGMDELCCLVKRYIAAARGYLSLSYSSCA: 531

. . . 550 . . . 560 . . . 570 . . . 580 . . . 590 . . . 600 . . . 610 . . . 620 . . . 630
LjNAP 539:GRIRFLGTPGVVALDIDAEKGLLQIVHLEHLEPKHQSBNISAITCDLSDFRKDWLSILMVTSSRSSNIRHLEKATVSTGKEGLLS: 628
MtNAP 537:GRIRFLGTPGVVALDIDAEKGLLQIVHLEHLEPKHQSBNISAITCDLSDFRKDWLSILMVTSSRSSNIRHLEKATVSTGKEGLLS: 626
AtNAP 532:GRIRVLMGTPGVVALDIDAEKGLLQIVHLEHLEPKHQSBNISAITCDLSDFRKDWLSILMVTSSRSSNIRHLEKATVSTGKEGLLS: 621

. . . 640 . . . 650 . . . 660 . . . 670 . . . 680 . . . 690 . . . 700 . . . 710 . . . 720
LjNAP 629:EGNSAYNWSRCVDELESVLSKHGSLRKLKLYFYHQHLLTAVFRNTMFGPEGRPHCCAWLGIASSFPCCSIPVPEEVTKGRDAVLVYVESLI: 718
MtNAP 627:EGNSAYNWSRCVDELESVLSKHGSLRKLKLYFYHQHLLTAVFRNTMFGPEGRPHCCAWLGIASSFPCCSIPVPEEVTKGRDAVLVYVESLI: 716
AtNAP 622:EGNSAYNWSRCVDELESVLSKHGSLRKLKLYFYHQHLLTAVFRNTMFGPEGRPHCCAWLGIASSFPCCSIPVPEEVTKGRDAVLVYVESLI: 711

. . . 730 . . . 740 . . . 750 . . . 760 . . . 770 . . . 780 . . . 790 . . . 800 . . . 810
LjNAP 719:ESIMGGLEGLINILDSGCGFCALENQLPEQAASHLNANASRVAPSPKSPKGTAGVPLPGHESVPENNNSIKMLEAAMQRLTNLCSVLND: 808
MtNAP 717:ESIMGGLEGLINILDSGCGFCALENQLPEQAASHLNANASRVAPSPKSPKGTAGVPLPGHESVPENNNSIKMLEAAMQRLTNLCSVLND: 806
AtNAP 712:ESIMGGLEGLINILDSGCGFCALENQLPEQAASHLNANASRVAPSPKSPKGTAGVPLPGHESVPENNNSIKMLEAAMQRLTNLCSVLND: 801

. . . 820 . . . 830 . . . 840 . . . 850 . . . 860 . . . 870 . . . 880 . . . 890 . . . 900
LjNAP 809:MEPICVNHVFLREYMRECI LGNFRRLRRLGVLKTDNDLQRPVLESLEIRHVSIVHLAEQHSMDITQGIREVLLSEAFSGPVSSLHIF: 898
MtNAP 807:MEPICVNHVFLREYMRECI LGNFRRLRRLGVLKTDNDLQRPVLESLEIRHVSIVHLAEQHSMDITQGIREVLLSEAFSGPVSSLHIF: 896
AtNAP 802:MEPICVNHVFLREYMRECI LGNFRRLRRLGVLKTDNDLQRPVLESLEIRHVMCIHHLAEQHSMDITQGIREVLLSEAFSGPVSSLHIF: 891

. . . 910 . . . 920 . . . 930 . . . 940 . . . 950 . . . 960 . . . 970 . . . 980 . . . 990
LjNAP 899:EKPPDQ...TGSAAVESVCNWIYENI IKDVSAGILFVPIHKCFSTRPVGGYFAESVTDLSELOAFVRIFGGYGVDRLDRMKVHTAALL: 986
MtNAP 897:EKPPDQ...TGSAAVESVCNWIYENI IKDVSAGILFVPIHKCFSTRPVGGYFAESVTDLSELOAFVRIFGGYGVDRLDRMKVHTAALL: 984
AtNAP 892:EKPAEQOQTGSAAVESVCNWIYMDNI IKDVSAGILFVPIHKCFSTRPVGGYFAESVTDLSELOAFVRIFGGYGVDRLDRMKVHTAALL: 981

. . . 1000 . . . 1010 . . . 1020 . . . 1030 . . . 1040 . . . 1050 . . . 1060 . . . 1070 . . . 1080
LjNAP 987:NCIDTTLRSNRDVLEAVATSHAGDRERBASMQIVDLTVIFCVQAGALAFDRLLAEASGATLEEGALIHSLLAGMVKHLDGVPDGV:1076
MtNAP 985:NCIDTTLRSNRDVLEAVATSHAGDRERBASMQIVDLTVIFCVQAGALAFDRLLAEASGATLEEGALIHSLLAGMVKHLDGVPDGV:1074
AtNAP 982:NCIDTTLRSNRDLTEAAAASVHSGDRVERDASVQIVDLTVIFCVQAGALAFDRLLAEASGAVLEEDNASLIHSMISGIVHHPPEEIP:1071

. . . 1090 . . . 1100 . . . 1110 . . . 1120 . . . 1130 . . . 1140 . . . 1150 . . . 1160 . . . 1170
LjNAP 1077:EKREIRRRKRVANVAGVVDHSDHSLWVRSILEVGGASDGSWSLLPYLFATFMTSNWTTAFNVDTGFGFSNNIHLARCISAVIAGSEV:1166
MtNAP 1075:EKREIRRRKRVANVAGVVDHSDHSLWVRSILEVGGASDGSWSLLPYLFATFMTSNWTTAFNVDTGFGFSNNIHLARCISAVIAGSEV:1164
AtNAP 1072:EKREIRRRKRVANVAGVVDHSDHSLWVRSILEVGGANDSWSLLPYLFATFMTSNWTTAFNVDTGFGFSNNIHLARCISAVIAGSEV:1161

. . . 1180 . . . 1190 . . . 1200 . . . 1210 . . . 1220 . . . 1230 . . . 1240 . . . 1250 . . . 1260
LjNAP 1167:RLREYQOHRQOSLNGH...AEGMDPELASHETSAEASINSTLQLVKFAEITLDSWSETORAHLVAQLIFLDQDCEISPYLPRSSLETHV:1253
MtNAP 1165:RLREYQOHRQOSLNGH...AEGMDPELASHETSAEASINSTLQLVKFAEITLDSWSETORSHLVAQLIFLDQDCEISPYLPRSSLETHV:1252
AtNAP 1162:RLREYQOHRQOSLNGHSHSENLDSEFPFRVTAEASINSSMLLVKFAEITLDSWSEBANSRHLVAKLIFLDQDCEISPYLPRSSLETHV:1251

. . . 1270 . . . 1280 . . . 1290 . . . 1300 . . . 1310 . . . 1320 . . . 1330 . . . 1340 . . . 1350
LjNAP 1254:PYALLRSYIYOYADTPSTPLAMNNSPRHSPAILLHASPLGRH...P.RGDS...TPPYGNDSGYFKGSSSSHSQDHLVDADIGSIR:1336
MtNAP 1253:PYALLRSYIYOYADTPSTPLAMNNSPRHSPAILLHASPLGRH...P.RGDS...TPPYGNDSGYFKGSSSSHSQDHLVDADIGSIR:1333
AtNAP 1252:PYALLRSYIYOYADTPSTPLS...TASPYHSPVSLHASPMSMNSTTPORGSYSGSSSTAAPDSGYFKGSSSSLYGQHYHTESETGNSR:1339

. . . 1360 . . . 1370 . . . 1380 . . . 1390 . . . 1400 . . . 1410 .
LjNAP 1337:N.....TRRSGLDYSASRNRVKSVESGTSSTGTPSPLPRFAVRSRSGPLAYK...:1383
MtNAP 1334:N.....TRRSGLDYCAGRHKVKSVESSNSGTSSTGTPSPLPRFAVRSRSGPLAYK...:1380
AtNAP 1340:NNNNNNNNKQRGSRRRSGLDYSSSH...K...GSGSNSTGTPSPLPRFAVRSRSGPLSYKQHN:1396

```

Supplemental figure 2. Alignment of *Lotus japonicus*, *Medicago truncatula* and *Arabidopsis thaliana* NAP proteins. *Lotus japonicus* sequence based on BP052201, but modified according to alternative splicing in other cDNAs. *Medicago truncatula* sequence based on AC147481 genome sequence with predicted amino acid sequence ABN0489.1 + ABN04850.1. In agreement with exon intron border sequences for *Lotus* and *Arabidopsis*, the amino acid sequence ILNYSIHSTMQ was removed from the predicted amino acid sequence ABN04850.1. The *Arabidopsis thaliana* sequence corresponds to AY496700.

## Map based cloning of Lj *Pir1*

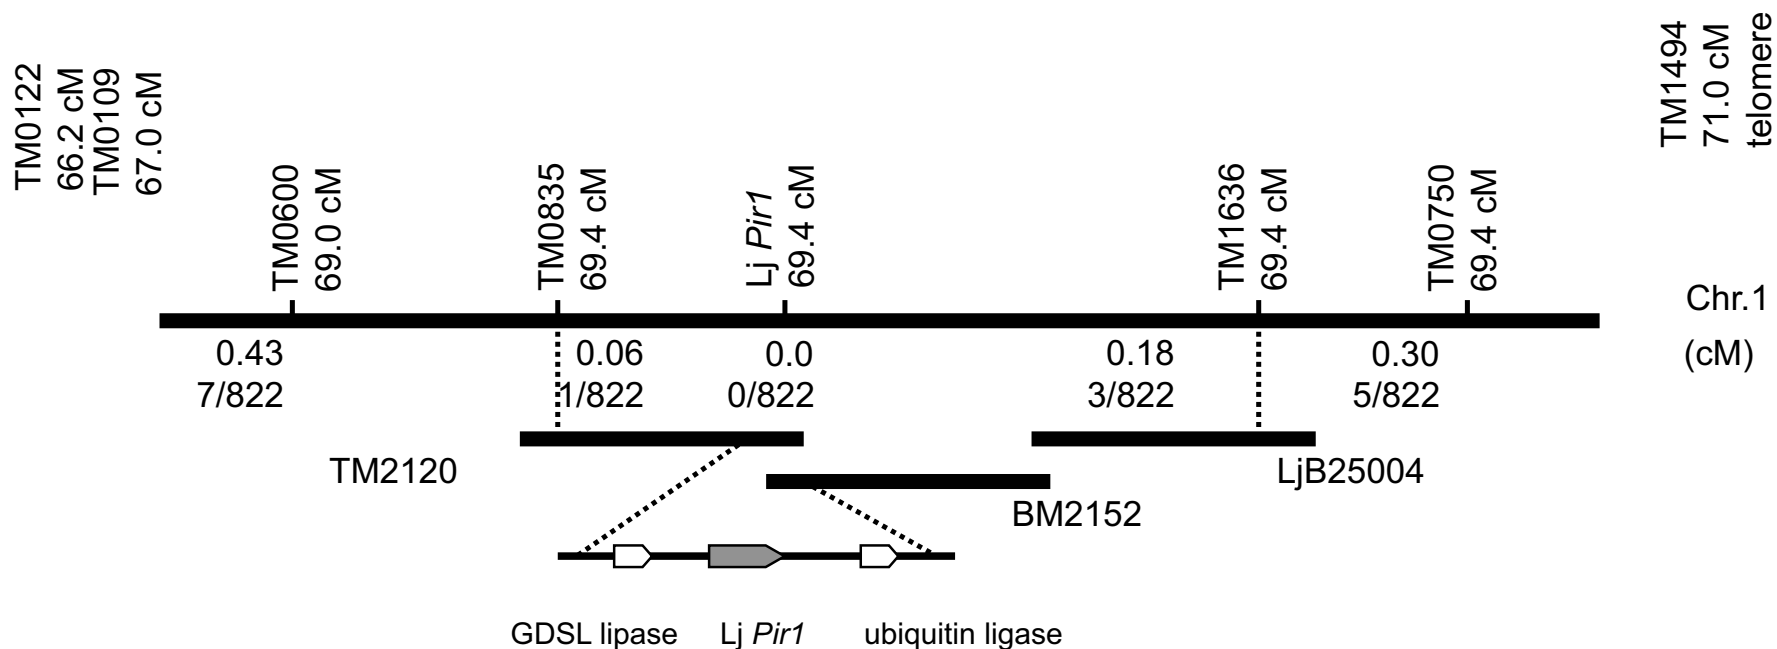

Supplemental Figure 3. The genomic region surrounding Lj *Pir1* on linkage group 1 is shown with cM position. The cM distance to adjacent microsatellite markers, the fraction of recombinant plants and the BAC (BM)/TAC (TM) contig are indicated. Only the end sequences are known for BAC clone LjB25004. Two genes flanking Lj *Pir1* are shown.

```

      .10 . . . .20 . . . .30 . . . .40 . . . .50 . . . .60 . . . .70 . . . .80 . . . .90
LjPIR 1:MAVPVEEAATAALSTFSLSEDEQPEVQGPVWVITDRRAATESPIEYSDVSAAYRLSLEDTKALNLLNALTTEGKEMASVLYTYRSCVKALPQ: 90
MtPIR 1:MAVPVEEAATAALSTFSLSEDEQPEVQGPVWVSTERCATESPIEYCDVAAYRLSLEDTKALNQLSSLTTEGKEMASVLYTYRSCVKALPQ: 90
AtPIR 1:MAVPVEEAATAALSTFSLSEDEQPEVQGPVWVSAERAATDSPIEYSDVAAYRLSLEDTKALNQLNLTTEGKEMASVLYTYRSCVKALPQ: 90

      .100 . . . .110 . . . .120 . . . .130 . . . .140 . . . .150 . . . .160 . . . .170 . . . .180
LjPIR 91:LPPSMKQSOADLYLEYTQVLDLEMSRLREIQRWQASASSKLADMQRFSRPERRINGPTISHLWSMLKLLDVLVQLDHLKNAKASIPNDF: 180
MtPIR 91:LPPSMKQSOADLYLEYTQVLDLEMSRLREIQRWQASASSKLADMQRFSRPERRINGPTISHLWSMLKLLDVLVQLDHLKNAKASIPNDF: 180
AtPIR 91:LPPSMKHQSOADLYLEYTQVLDLEMSRLREIQRWQSSASAKLADMQRFSRPERRINGPTVTHLWSMLKLLDVLVQLDHLKNAKASIPNDF: 180

      .190 . . . .200 . . . .210 . . . .220 . . . .230 . . . .240 . . . .250 . . . .260 . . . .270
LjPIR 181:SWYKRTFTQVSSQWQDQDTSMREELDDLOIFLSTRWAILLNHLVEMFRVNNVEDILOALIVFVVESELEDFALLFPERHILLRVLVPLVVL: 270
MtPIR 181:SWYKRTFTQVSSQWQDQDTSMREELDDLOIFLSTRWAILLNHLVEMFRVNNVEDILOALIVFAVESELEDFALLFPERHILLRVLVPLVVL: 270
AtPIR 181:SWYKRTFTQVSSQWQDQDTSMREELDDLOIFLSTRWAILLNHLVEMFRVNNVEDILOALIVFVVESELEDFALLFPERHILLRVLVPLVVL: 270

      .280 . . . .290 . . . .300 . . . .310 . . . .320 . . . .330 . . . .340 . . . .350 . . . .360
LjPIR 271:VTSSEKDESLEYKRVKINRLINIFKNEVVIAPFPDLHLSPAAILKELSYFYPKFSSTRLTLTAPHELPPRDAOEYQRHYLIVNHIGAV: 360
MtPIR 271:VTSSEKDESLEYKRVKINRLINIFKNEVVIAPFPDLHLSPAAILKELSYFYPKFSSTRLTLTAPHELPPRDAOEYQRHYLIVNHIGAV: 360
AtPIR 271:ATPSEKDEALEYKRVKINRLINIFKNDVVIAPFPDLHLSPAAILKELSYFYPKFSSTRLTLTAPHELPPRDAOEYQRHYLIVNHIGAV: 360

      .370 . . . .380 . . . .390 . . . .400 . . . .410 . . . .420 . . . .430 . . . .440 . . . .450
LjPIR 361:RAEHDDFTTRFASAMNQLLLKSDGSDVDWSKEVKNMMDYIVVEGFQLLSRWRTARWEQCAWKFSRRCCKDA.....SPSFSDEYKVVV: 444
MtPIR 361:RAEHDDFTTRFASAMNQLLLKSDGSDVDWSKEVKNMMDYIVVEGFQLLSRWRTARWEQCAWKFSRRCCKDA.....SPSFSDEYKVVV: 444
AtPIR 361:RAEHDDFTTRFASAMNQLLLKSDGAYTEWCREVKNMMDYIVVEGFQLLSRWRTARWEQCAWKFSRRCCKDAGETPEASGSVSDYKVVV: 450

      .460 . . . .470 . . . .480 . . . .490 . . . .500 . . . .510 . . . .520 . . . .530 . . . .540
LjPIR 445:YNYIAEERKALVELVSNIKSVGSMQRCDTLVADALWETHSEVQDFVQNTLASMLRRTTFRKKKDLRSILSDMRTLADWMANTNKSESE: 534
MtPIR 445:YNYIAEERKALVELVSCIKSVGSMQRCDTLVADALWETHIAEVQDFVQNTLASMLRRTTFRKKKDLRSILSDMRTLADWMANTNKSESE: 534
AtPIR 451:YNYIAEERKALVELVGYIKSVGSMQRCDTLVADALWETHIAEVQDFVQNTLASMLRRTTFRKKKDLRSILSDMRTLADWMANTNRPESE: 539

      .550 . . . .560 . . . .570 . . . .580 . . . .590 . . . .600 . . . .610 . . . .620 . . . .630
LjPIR 535:LQSSQHGGEESKANIFYPRVAVPTAAQVHCLQFLIYEVVSGGNLRRPGGIFGNSGSEIPVNDLKQLETFFYKLGFFLHILDYSVTVAITL: 624
MtPIR 535:LQSSQHGGEESKANIFYPRVAVPTAAQVHCLQFLIYEVVSGGNLRRPGGIFGNSGSEIPVNDLKQLETFFYKLGFFLHILDYSVTVAITL: 624
AtPIR 540:MPSSQHGNDSESRGNFFYPRVAVPTAAQVHCLQFLIYEVVSGGNLRRPGGIFGNNGSEIPVNDLKQLETFFYKLSFFLHILDYSASIGILT: 629

      .640 . . . .650 . . . .660 . . . .670 . . . .680 . . . .690 . . . .700 . . . .710 . . . .720
LjPIR 625:DLGFLWFRREFYLESSRVIOFPFIECSLPWMLVDCVLESPNSGLLESVLPFDIYNDSAQQALVLLKORFLYDEIEAEVDHCFDIFVSKLCE: 714
MtPIR 625:DLGFLWFRREFYLESSRVIOFPFIECSLPWMLVDCVLESPNSGLLESVLPFDIYNDSAQQALVLLKORFLYDEIEAEVDHCFDIFVSKLCE: 714
AtPIR 630:DLGFLWFRREFYLESSRVIOFPFIECSLPWMLVDCVLESPNSGLLESVLPFDIYNDSAQQALVLLKORFLYDEIEAEVDHCFDIFVSKLCE: 719

      .730 . . . .740 . . . .750 . . . .760 . . . .770 . . . .780 . . . .790 . . . .800 . . . .810
LjPIR 715:TIFTYYKSWAASELLDPSFLFASENAKEYAVOPMRLNMLKMTRVKLLGRMINLRSLITERNKIFRENIEFLDRFECQDLCAIVELEK: 804
MtPIR 715:TIFTYYKSWAASELLDPSFLFASENAKEYAVOPMRLNMLKMTRVKLLGRMINLRSLITERNKIFRENIEFLDRFECQDLCAIVELEK: 804
AtPIR 720:SIFTYYKSWAASELLDPSFLFALDNKEKFSIQVFRVETALFKMTRVKLLGRMINLRSLIAQRNRFRENIEFLDRFECQDLCAIVELEK: 809

      .820 . . . .830 . . . .840 . . . .850 . . . .860 . . . .870 . . . .880 . . . .890 . . . .900
LjPIR 805:LLDVLKHSHELLSRDHSIDSFSLMLNMQENISLVSFSSRLASQIWMSEMQSDFLPNFILCNTTQRFIRSSKTPVPQKPSIPSAKPSFYCG: 894
MtPIR 805:LLDVLKHSHELLSRDHSIDSFSLMLNMQENISLVSFSSRLASQIWMSEMQSDFLPNFILCNTTQRFIRSSKTPVPQKPSIPSAKPSFYCG: 894
AtPIR 810:LLDVLKHSHELLSRDHSIDSFSLMLNMQENISLVSFSSRLASQIWMSEMQSDFLPNFILCNTTQRFIRSSKTPVPQKPSIPSAKPSFYCG: 899

      .910 . . . .920 . . . .930 . . . .940 . . . .950 . . . .960 . . . .970 . . . .980 . . . .990
LjPIR 895:TQDLNSAHQSFARLHSGFFGISHMFAIVQLLGRSRLPWLIRALLDHISNKITILEPMITGLQESLPKSIGLLEFDGGVGTGCVRLVKEQLN: 984
MtPIR 895:TQDLNSAHQSFARLHSGFFGIPHMFISIVQLLGRSRLPWLIRALLDHISNKITILEPMITGLQESLPKSIGLLEFDGGVGTGCVRLVKEQLN: 984
AtPIR 900:TQDLNSAHQSFARLHSGFFGIPHMFISIVQLLGRSRLPWLIRALLDHISNKITILEPMISGLQESLPKSIGLLEFDGGVGTGCMKLIKEQLN: 989

      .1000 . . .1010 . . .1020 . . .1030 . . .1040 . . .1050 . . .1060 . . .1070 . . .1080
LjPIR 985:WETKSELKAEVLEHGKIEIGSVLYVMGLLDIVIREVDTMNFQOTAPWLGGLPGADGQILTSQDGGSPVVSIFKSTAAAMASVPGQSPSP:1074
MtPIR 985:WETKSELKAEVLEHGKIEIGSVLYVMGLLDIVIREVDTMNFQOTAPWLGGLPGADGQILTSQDGGSPVVSIFKSTAAAMASVPGQSPSP:1074
AtPIR 990:WGTKSELKSEVLEHGKIEIGSVLYVMGLLDIVIREVDTKRFQOTAPWLGGLPGADGQIVNAQDGLESPIVNLKSAVSAVVSPGCLNPA:1078

      .1090 . . .1100 . . .1110 . . .1120 . . .1130 . . .1140 . . .1150 . . .1160 . . .1170
LjPIR 1075:FHIMSKQAEAAADLLKANLNNGSVLEYALAFSTAALDKYCSKWSAAPKTGFIDITISKDFYRIYSGLOIGYLEESAQVQSSINSHORLGDV:1164
MtPIR 1075:FHIMSKQAEAAADLLKANLNNGSVLEYALAFSTAALDKYCSKWSAAPKTGFIDITISKDFYRIYSGLOIGYLEESAQVQSSPERLGDV:1164
AtPIR 1079:RYTMSKQAEAAADLLKANLNNGSVLEYLAFSTAALDKYCSKWSAAPKTGFIDITISKDFYRIYSGLOIGYLEEITAPQSAQHEVLGDS:1168

      .1180 . . .1190 . . .1200 . . .1210 . . .1220 . . .1230 . . .1240 . . .1250 . . .1260
LjPIR 1165:AWGGCTIIYLLGQQLHFELDFSYQILNIAEVEAASVVOTKNSHF..AGWEALLEATKKARRLNHNVFMSLRARCPLKKTACAIKQSG:1254
MtPIR 1165:AWGGCTIIYLLGQQLHFELDFSYQILNIAEVEAASVVOTKNSHF..AGWEALLEATKKARRLNHNVFMSLRARCPLKKTACAIKQSG:1252
AtPIR 1169:AWGGCTIIYLLGQQLHFELDFSYQVNLNVEVEVTSASHTERNPQI..H..QWELLEAMKKARRLNHNVFMSLRARCPLKKTACAIKQSG:1257

      .1270 . . .1280 . . .
LjPIR 1255:APLHRIKFDNTVSAFETLPQKGA...:1277
MtPIR 1253:APLHRIKFDNTVSAFETLPQKGA...:1275
AtPIR 1258:APLPRVRFENTVSAFETLPQKGTVG:1282

```

Supplemental Figure 4. Alignment of *Lotus japonicus*, *Medicago truncatula* and *Arabidopsis thaliana* PIR proteins. Lj PIR and At PIR (AAS78644.1) are based on full length cDNA sequences and Mt PIR is based on the genome sequence (AC146587) and EST sequence AW697392, tentative clusters TC110992, TC108945 and TC98507 and alignment of exons with Lj *Pir* and At *Pir*.

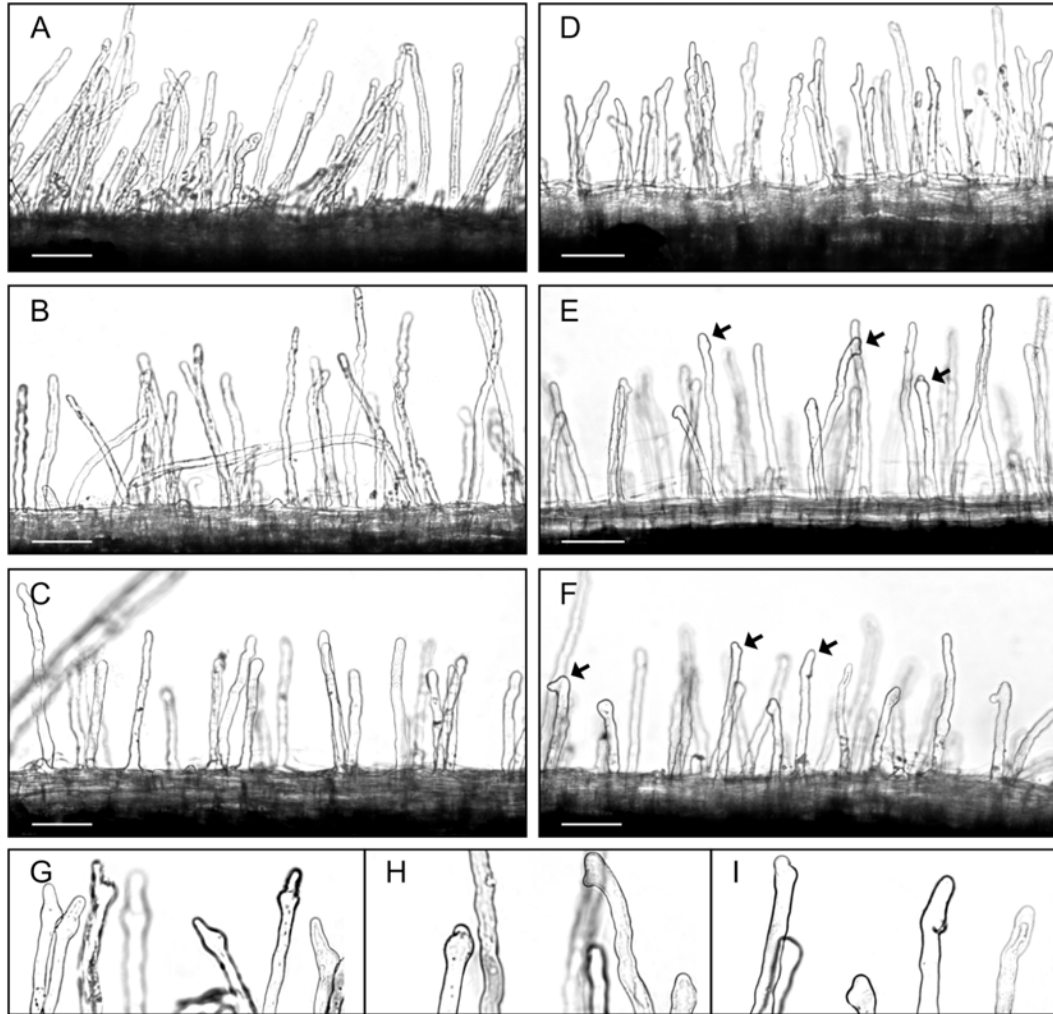

### Supplemental Figure 5

#### Root hair deformations in *Lotus japonicus* wild-type and *nap1-1* and *pir1-1* mutants.

2 day old wild type Gifu (A and D), *nap1-1* (B and E), and *pir1-1* (C and F) seedlings were incubated in the absence (A, B, and C) or presence (D, E, and F) of the *M. loti* nodulation (Nod) factor (approx. 10 nM).

The root hair responses were scored and photographed 16 hours after Nod factor addition.

Panels G, H, and I represent close-ups of root hair deformations shown in D, E, and F, respectively.

Scale bars: 100 $\mu$ m.
